# Supplementary material
Source: Springer Nature journal article supplement (https://www.springermedizin.de/resource/supplementary/13058_2011_2932_MOESM8_ESM.pdf/9702794)

**A**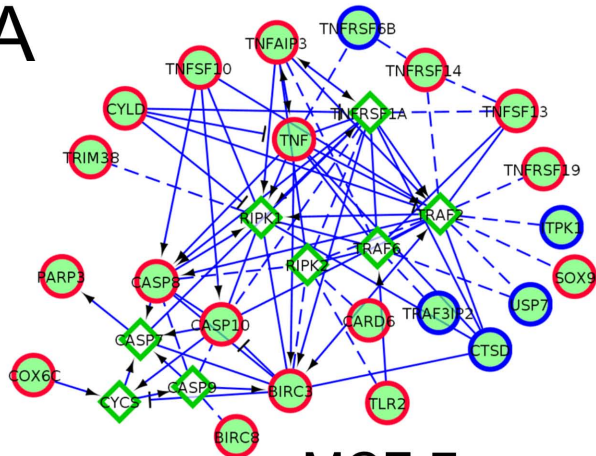**MCF-7****B**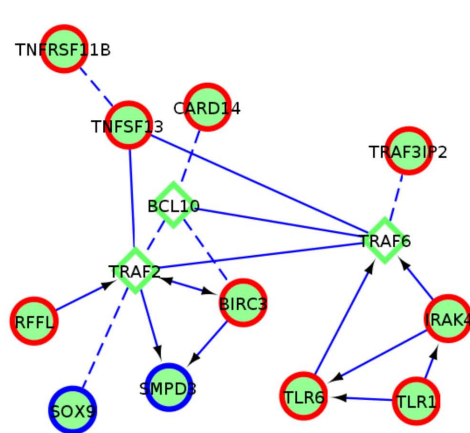**A2780****C**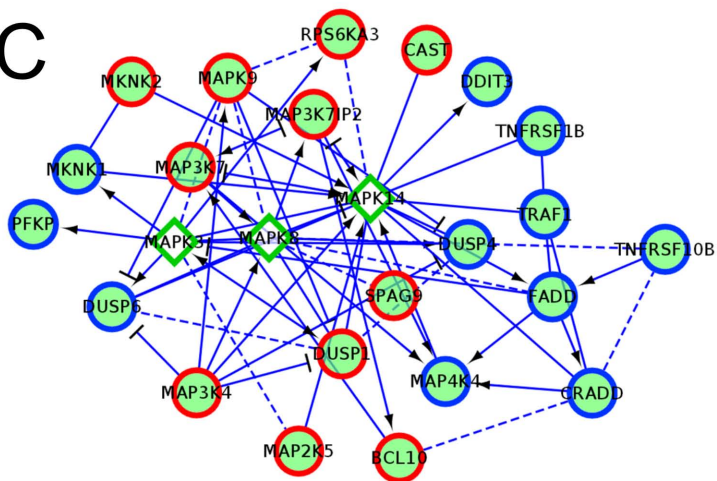**MDA-MB-231**

Supplement: MOESM8 [file 9702794]
